# Supplementary material
Source: Royal Society of Chemistry journal article supplement (doi:10.1039/d6em00126b)
Supplement: d6em00126b1.pdf [file d6em00126b1.pdf]

## Supplementary Information

### Release of microplastics and metals from antifouling paint during weathering

Guadalupe Santos<sup>1</sup>, Georgina C. Kalogerakis<sup>1</sup>, Jun-Ray Macairan<sup>1</sup>, Laura M. Hernandez<sup>1</sup>,  
Houssame-Eddine Ahabchane<sup>2</sup>, Jennifer F. Provencher<sup>3</sup>, Kevin J. Wilkinson<sup>2\*</sup> and Nathalie  
Tufenkji<sup>1, 4\*</sup>

<sup>1</sup>Department of Chemical Engineering, McGill University, Montreal, Quebec, H3A 0C5 Canada

<sup>2</sup>Department of Chemistry, University of Montréal, Montreal, Quebec, H2V 0B33, Canada

<sup>3</sup>Environment and Climate Change Canada, National Wildlife Research Centre, Ottawa, Ontario,  
K1A 0H3, Canada

<sup>4</sup>United Nations University Institute for Water, Environment and Health, Richmond Hill, Ontario,  
L4B 3P4, Canada

\* Corresponding author: [nathalie.tufenkji@mcgill.ca](mailto:nathalie.tufenkji@mcgill.ca), [kj.wilkinson@umontreal.ca](mailto:kj.wilkinson@umontreal.ca)

Number of Figures: 12

Number of Tables: 6

Number of Text: 1

Number of Pages: 25

40 **Table S1.** Summary of literature examining the release of nanoplastics, microplastics, and metals from various types of paints.

41

| Category of paint products released |                                      | Paint type                                                   | Sizes observed (average or range) | Concentration range or percentage composition released | Main analytical techniques*       | Weathering conditions                                   | Ref.                                             |
|-------------------------------------|--------------------------------------|--------------------------------------------------------------|-----------------------------------|--------------------------------------------------------|-----------------------------------|---------------------------------------------------------|--------------------------------------------------|
| nanoplastics                        | polyacrylate                         | building paints                                              | 97 – 98 nm                        | not specified                                          | SEM-EDX, Raman, DLS, FTIR, AF-FFF | laboratory: dispersed in demineralized water            | Müller <i>et al.</i> , 2022a <sup>1</sup>        |
|                                     | suspected styrene or acrylic         | building paints                                              | <500 nm                           | not specified                                          | SEM-EDX, Raman                    | none                                                    | Fang <i>et al.</i> , 2024 <sup>2</sup>           |
| microplastics                       | unidentified thermoplastic           | road marking paints                                          | 1 – 4 mm                          | 18.5 ± 4.2 – 66 ± 7.7 particles/100 g of river water   | optical microscopy, Raman         | natural: river                                          | Horton <i>et al.</i> , 2017 <sup>3</sup>         |
|                                     | alkyds poly(acrylate/styrene)        | Industrial paints, marine based paints                       | <50 – 500 µm                      | 171 ± 113 particles/L<br>24 ± 21 particles/L           | FTIR                              | natural: seacoast in Korea                              | Song <i>et al.</i> , 2014 <sup>4</sup>           |
|                                     | polyurethane                         | contamination from the research vessel, marine based paints  | 0.3 – 23 mm                       | 2805 particles/ 9127 m <sup>3</sup> filtered seawater  | FTIR, SEM                         | natural: Antarctic peninsula                            | Lacerda <i>et al.</i> , 2019 <sup>5</sup>        |
|                                     | not specified                        | marine based paints                                          | 0.1 – 5 mm                        | maximum approximately 900 particles/m <sup>2</sup>     | optical microscopy                | natural: coastal sediments in Campeche Bay, Mexico      | Borges Ramirez <i>et al.</i> , 2019 <sup>6</sup> |
|                                     | alkyd, epoxy, chlorinated rubber     | marine based paints, building paints and road marking paints | 180 µm (median)                   | 0.01 paint particles/m <sup>3</sup>                    | XRF, ATR-FTIR                     | natural: North Atlantic Ocean                           | Turner <i>et al.</i> , 2022 <sup>7</sup>         |
|                                     | not specified                        | marine based paints                                          | 1 – 3 mm                          | 12.8% out of 398 microplastic particles                | optical microscopy                | natural: sediments from the Paranaguá Estuarine Complex | Mengatto & Nagai, 2022 <sup>8</sup>              |
|                                     | acrylates polyurethane varnish (APV) | marine based paints                                          | <75 µm                            | mean numerical proportion: 70 ± 19%                    | µFTIR, ATR-FTIR, optical          | natural: Sediments from Rhine River                     | Mani <i>et al.</i> , 2019 <sup>9</sup>           |

|                                                            |                                                             |                    |                                                                                                         |  |                          |                                                                |                                                      |
|------------------------------------------------------------|-------------------------------------------------------------|--------------------|---------------------------------------------------------------------------------------------------------|--|--------------------------|----------------------------------------------------------------|------------------------------------------------------|
|                                                            |                                                             |                    |                                                                                                         |  | microscopy               |                                                                |                                                      |
| thermosetting polyester, epoxy resins                      | marine based paints                                         | not specified      | not specified                                                                                           |  | FTIR                     | natural: coastal waters of plymouth                            | Higgins & Turner, 2023 <sup>10</sup>                 |
| alkyd resin, poly(acrylate/styrene)                        | marine based paints                                         | 50 – >1000 $\mu$ m | 98.7% in surface microlayer<br>99.6% in surface seawater-hand net<br>60% in surface seawater -trawl net |  | FTIR                     | natural: surface sea waters of Korean west coast               | Chae <i>et al.</i> , 2015 <sup>11</sup>              |
| not specified                                              | marine based paints                                         | 0.3 – 5 mm         | 0.03 – 0.65 paint particles/m <sup>3</sup>                                                              |  | FTIR, optical microscopy | natural: surface waters of Korea                               | Kwon <i>et al.</i> , 2020 <sup>12</sup>              |
| not specified                                              | marine based paints                                         | 1 – 5 mm<br>>5 mm  | 80% of total mesoparticles<br>32% of total macroplastics                                                |  | ATR-FTIR, SEM-EDX        | natural: sediments in Tunisian coast                           | Jaouani <i>et al.</i> , 2022 <sup>13</sup>           |
| not specified                                              | marine based paints                                         | <0.4 mm (mean)     | 12% of total plastic particles                                                                          |  | optical microscopy       | natural: plankton samples in Western Tropical Atlantic Ocean   | Ivar do Sul <i>et al.</i> , 2014 <sup>14</sup>       |
| alkyd                                                      | marine based paints, contamination from the research vessel | <2 mm              | 0.94 to 232 particles/m <sup>3</sup>                                                                    |  | optical microscopy, FTIR | natural: southeastern coast of Korea                           | Kang <i>et al.</i> , 2015(Kang <i>et al.</i> , 2015) |
| not specified                                              | marine based paints                                         | <5 mm              | 29% of total particles                                                                                  |  | optical microscopy       | natural: plankton samples in Western Tropical Atlantic Ocean   | Lima <i>et al.</i> , 2014 <sup>16</sup>              |
| not specified                                              | marine based paints                                         | 4 $\mu$ m – <10 mm | 58 $\pm$ 58 particles/m <sup>2</sup>                                                                    |  | Raman                    | natural: sediments from Lake Garda                             | Imhof <i>et al.</i> , 2016 <sup>17</sup>             |
| not assignable but suspected APV polyester oxide           | marine based paints, contamination from the research vessel | 101 – 8932 $\mu$ m | 48% of total plastic particles                                                                          |  | $\mu$ XRF, ATR-FTIR      | natural: surface and subsurface water samples from Weddell Sea | Leistenschneider <i>et al.</i> , 2021 <sup>18</sup>  |
| poly(methyl methacrylate) polyvinyl chloride polycarbonate | marine based paints                                         | <1000 $\mu$ m      | Highest values: 53% (PMMA), 38% (PVC), 2% (PC)                                                          |  | py-GC-MS                 | natural: the German Bight (North Sea)                          | Dibke <i>et al.</i> , 2021 <sup>19</sup>             |

|                     |                                            |                       |                                                                           |                                                                                                                                             |                                    |                                                                                                                                              |                                              |
|---------------------|--------------------------------------------|-----------------------|---------------------------------------------------------------------------|---------------------------------------------------------------------------------------------------------------------------------------------|------------------------------------|----------------------------------------------------------------------------------------------------------------------------------------------|----------------------------------------------|
|                     | not specified                              | marine based paints   | not specified                                                             | 0.01 – 3 mm                                                                                                                                 | optical microscopy, Raman, SEM-EDX | natural: marinas on the Swedish coast                                                                                                        | Gondiaks <i>et al.</i> , 2023 <sup>20</sup>  |
| Metal nanoparticles | TiO <sub>2</sub><br>Ag<br>SiO <sub>2</sub> | industrial paint      | TiO <sub>2</sub> : <10 nm<br>Ag: 40 and 90 nm<br>SiO <sub>2</sub> : 12 nm | TiO <sub>2</sub> : 4–8 µg/L<br>Ag: Under detection limit (0.1 µg/L)<br>SiO <sub>2</sub> : 73 mg/L (1.8% of total SiO <sub>2</sub> in paint) | ICP-OES, TEM-EDX, XRF              | laboratory: UV irradiation (500 h, UV-A), abrasion (500 g load with 500 cycles/rotation)                                                     | Zuin <i>et al.</i> , 2014 <sup>21</sup>      |
|                     | SiO <sub>2</sub>                           | industrial paint      | 12 nm                                                                     | 0.065 mg/L (2.3% of the total nano-SiO <sub>2</sub> in panels)                                                                              | ICP-OES, TEM-EDX                   | laboratory: UV irradiation and precipitation (89 six-hour cycle, UV-A)                                                                       | Al-Kattan <i>et al.</i> , 2015 <sup>22</sup> |
|                     | TiO <sub>2</sub><br>Ag<br>SiO <sub>2</sub> | industrial paint      | Ti: 30 nm<br>Ag: 50 nm<br>Si: 10 nm                                       | Ti: 0.00048‰<br>Ag: 0.025‰ to 0.055‰<br>Si: 0.38–0.62%                                                                                      | ICP-MS, DLS                        | laboratory: static water immersion test, UV irradiation (UV-A, 63 cycles of 8 h each), precipitation (500 h)                                 | Zhang <i>et al.</i> , 2017 <sup>23</sup>     |
|                     | TiO <sub>2</sub>                           | building paint        | 20 – 60 nm                                                                | <0.001% of total nano-TiO <sub>2</sub> in paint                                                                                             | SP-ICP-MS                          | natural: 10 weeks winter, 7 weeks summer<br>laboratory: Room temperature, freezing (-10 C), freeze thaw (24 h freeze, 24 h thaw) for 42 days | Azimzada <i>et al.</i> , 2020a <sup>24</sup> |
|                     | TiO <sub>2</sub>                           | building paint        | 20 – 300 nm                                                               | maximum 600 µg/L                                                                                                                            | ICP-MS, ICP-OES, TEM-EDX           | natural: runoff (1 rain event)                                                                                                               | Kaegi <i>et al.</i> , 2008 <sup>25</sup>     |
|                     | CeO <sub>2</sub>                           | building paint, stain | 17.5 nm (paint), 16.6 nm (stain)                                          | 15% (paint) and 35% (stain) of total NP-Ce in paint                                                                                         | SP-ICP-MS                          | natural weathering: 11 weeks starting Oct and 12 weeks starting Jan                                                                          | Jreije <i>et al.</i> , 2022 <sup>26</sup>    |
|                     | Ag                                         | building paint        | Ag: <15 nm                                                                | 30% of total NP-Ag in paint                                                                                                                 | ICP-MS, TEM-EDX                    | natural: runoff (65 runoff events, 372 days)                                                                                                 | Kaegi <i>et al.</i> , 2010 <sup>27</sup>     |
|                     | TiO <sub>2</sub>                           | building paint        | up to 100 nm (in supernatant)                                             | not applicable                                                                                                                              | DLS, SEM-EDX, AF-FFF, Raman        | laboratory: dispersed in milli-q water                                                                                                       | Muller <i>et al.</i> , 2022a <sup>1</sup>    |
|                     | Cu <sub>2</sub> O                          | marine based paints   | 40 – 460 nm                                                               | 0.21% of total Cu in paint (aluminum bars, 180 days)<br>1.76% of total Cu in                                                                | SP-ICP-MS, DLS, SEM-EDX            | laboratory: submerged panels with fluorescent light exposure and shaking (simulates natural waters)                                          | Adeleye <i>et al.</i> , 2016 <sup>28</sup>   |

|              |                                 |                       |               |                                                                                                                                                                                                                                             |                          |                                                                                                             |                                              |
|--------------|---------------------------------|-----------------------|---------------|---------------------------------------------------------------------------------------------------------------------------------------------------------------------------------------------------------------------------------------------|--------------------------|-------------------------------------------------------------------------------------------------------------|----------------------------------------------|
|              |                                 |                       |               | paint (wood bars, 180 days)                                                                                                                                                                                                                 |                          | for 180 d                                                                                                   |                                              |
|              | TiO <sub>2</sub>                | building paint, stain | 20 – > 200 nm | 10 <sup>-4</sup> % of total TiO <sub>2</sub> in paint<br>6% of total TiO <sub>2</sub> in wood stain                                                                                                                                         | SP-ICP-MS, SP-ICP-TOF-MS | natural: 11 weeks starting Oct and 12 weeks starting Jan                                                    | Azimzada <i>et al.</i> , 2020b <sup>29</sup> |
|              | TiO <sub>2</sub>                | industrial paint      | 20 – 80 nm    | 0.007% of total nano-TiO <sub>2</sub>                                                                                                                                                                                                       | SEM-EDX, TEM             | laboratory: 113 cycles, 6 h (3 hours of UV irradiation (UV-B), 0.5 h of irrigation and 2.5 h of drying)     | Al-Kattan <i>et al.</i> , 2013 <sup>30</sup> |
|              | Cu                              | marine based paints   | 45 – 100 nm   | maximum 1.2 x 10 <sup>7</sup> particles/m <sup>3</sup>                                                                                                                                                                                      | SP-ICP-MS                | natural: marinas on the Swedish coast                                                                       | Gondikas <i>et al.</i> , 2023 <sup>20</sup>  |
| Total metals | Cu<br>Zn                        | marine based paint    | not available | Cu: ~16.0% of total Cu in dry paint (maximum)<br>Zn: ~11.0% of total Zn in dry paint (maximum)                                                                                                                                              | ICP-OES                  | laboratory: room temperature (19 °C) or in refrigerator (4 °C) for 120 h; different salinities              | Singh & Turner, 2009 <sup>31</sup>           |
|              | Cu<br>Zn                        | marine based paint    | not available | Cu: 70 µg/cm <sup>2</sup> day (acrylic, maximum)<br>Zn: 64 µg/cm <sup>2</sup> day (acrylic, maximum)                                                                                                                                        | AAS                      | laboratory: submerged in artificial sea water with wave-like conditions and at room temperature (23 °C)     | Jalaie <i>et al.</i> , 2023 <sup>32</sup>    |
|              | Al<br>S<br>Cu<br>Zn<br>Cd<br>Pb | marine based paint    | not available | All percentages are maximums.<br>Zn: 2.0% (paint mix), 0.1% (Alusafe)<br>Cu: 0.2% (paint mix), 0.9% (Alusafe)<br>S: 26.0% (paint mix), 5.0% (Alusafe)<br>Cd: 4.5% (paint mix), 0.7% (Alusafe)<br>Pb: 0.1% (paint mix)<br>Al: 0.7% (Alusafe) | ATR-FTIR, ICP-OES        | laboratory: UV irradiation (UV-C) for 21 days, leaching in algae growth media for 168 h                     | Simon <i>et al.</i> , 2021 <sup>33</sup>     |
|              | Cu<br>Zn                        | marine based paint    | not available | Cu: 10.0 – 15.0% loss<br>Zn: <8.0% loss                                                                                                                                                                                                     | ICP-OES                  | laboratory: submerged in artificial sea water, with 12 h light-dark cycles using fluorescent tubes for 80 h | Holmes & Turner, 2009 <sup>34</sup>          |
|              | Cu<br>Zn                        | marine based paint    | not available | Cu: 0.5% – 3.0% loss in aqueous phase                                                                                                                                                                                                       | ICP-OES                  | laboratory: submerged in tap water (pH 7.3) or rainwater                                                    | Jessop & Turner,                             |

|  |  |  |  |                                          |  |                    |                    |
|--|--|--|--|------------------------------------------|--|--------------------|--------------------|
|  |  |  |  | Zn: 5.0 – 30.0% loss<br>in aqueous phase |  | (pH 4.7) for 120 h | 2011 <sup>35</sup> |
|--|--|--|--|------------------------------------------|--|--------------------|--------------------|

42

43 \*AAS = atomic absorption spectroscopy; AF-FFF = asymmetric flow-field flow fractionation; FTIR = Fourier transform infrared spectroscopy; ATR-FTIR  
44 = attenuated total reflectance FTIR; DLS: dynamic light scattering; EDX = energy-dispersive X-ray spectroscopy; ICP-MS = inductively coupled plasma  
45 time-of-flight mass spectrometry; ICP-OES = inductively coupled plasma optical emission spectroscopy; py-GC-MS = pyrolysis gas chromatography-mass  
46 spectrometry; SEM = scanning electron microscopy; SP-ICP-TOF-MS = single particle inductively coupled plasma time-of-flight mass spectrometry; TEM  
47 = transmission electron microscopy; and XRF = X-ray fluorescence.

48 **Table S2.** Composition of MicronCSC-CA antifouling paint<sup>36</sup> and base Interprotect2000E primer  
 49 paint,<sup>37</sup> according to the manufacturer (Interlux®).

| MicronCSC-CA antifouling paint |                       | base Interprotect2000E primer paint    |                       |
|--------------------------------|-----------------------|----------------------------------------|-----------------------|
| Ingredient                     | Weight percentage (%) | Ingredient                             | Weight percentage (%) |
| copper (I) oxide               | 30 - 60               | polymer of epoxy resin and bisphenol A | 10 - 25               |
| zinc oxide                     | 10 - 30               | talc                                   | 10 - 25               |
| xylene                         | 7 - 13                | barium sulfate                         | 10 - 25               |
| iron oxide                     | 3 - 7                 | titanium dioxide                       | 10 - 25               |
| butyl alcohol, n-              | 3 - 7                 | mica                                   | 1.0 - 10              |
| ethyl benzene                  | 1 - 5                 | xylenes                                | 1.0 - 10              |
| ethyl toluene sulfonamide      | 1 - 5                 | butanol                                | 1.0 - 10              |
| copper (II) oxide              | 1 - 5                 | petroleum naphtha                      | 1.0 - 10              |
|                                |                       | 1,2,4-trimethyl benzene                | 1.0 - 10              |
|                                |                       | benzene, ethyl-                        | 1.0 - 10              |
|                                |                       | 1,3,5-trimethylbenzene                 | 1.0 - 10              |

50  
 51 **Figure S1.** Spectrum of the UV lamp (Arcadia 54w T5 D3+ 6% UVB 46", ReptilesRuS) as  
 52 provided by the manufacturer. The x-axis denotes the wavelength (nm); the y-axis denotes the  
 53 relative intensity of the light.

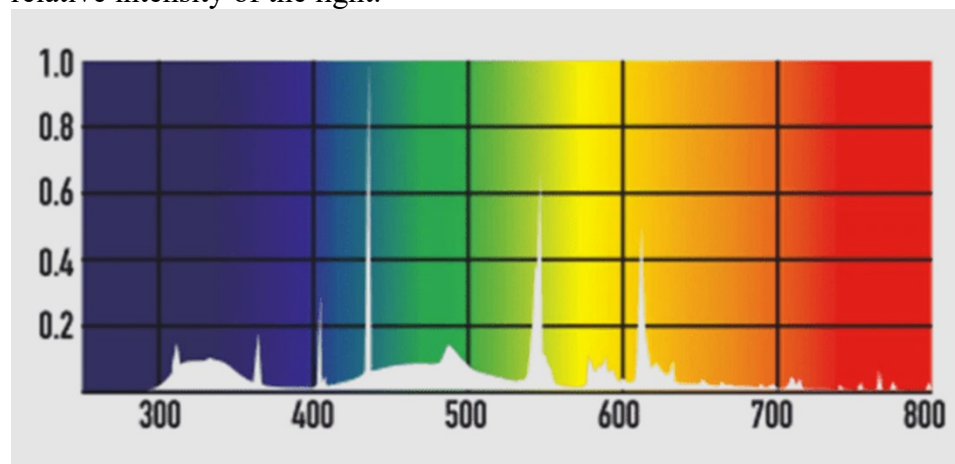

54  
 55  
 56

57 **Text S1.** The equivalent UV irradiation used in this experiment was calculated using a measured  
58 average UV radiation of  $12.7 \pm 1.0 \text{ W m}^{-2}$  during the 21 days the UV lamps were turned on. Using  
59 the yearly radiant exposure data in Canada ( $49000 \text{ W h m}^{-2}/\text{year}$ ) used by Hernandez et al. (2023),  
60 <sup>38</sup> the corresponding real-world UV radiation was calculated as follows:

61 
$$12.7 \text{ W} \cdot \text{m}^{-2} \times 24 \frac{\text{h}}{\text{day}} = 304.8 \text{ W} \cdot \text{h} \cdot \text{m}^{-2} \text{ per day}$$

$$304.8 \text{ W} \cdot \text{h} \cdot \text{m}^{-2} \text{ per day} \times 21 \text{ days} = 6400 \text{ W} \cdot \text{h} \cdot \text{m}^{-2}$$

62 
$$\frac{6400 \text{ W} \cdot \text{h} \cdot \text{m}^{-2}}{49000 \text{ W} \cdot \text{h} \cdot \frac{\text{m}^{-2}}{\text{year}}} = 0.1306 \text{ years} = 47.7 \text{ days}$$

63

64 **Figure S2.** Nujol mull spectrum of the suspected rosin (CAS  
 65 8050-09-7). Major peaks (cm-1) are listed with their corresponding transmittance (%). The  
 66 spectrum is provided by the Chemical Book.<sup>39</sup>

67

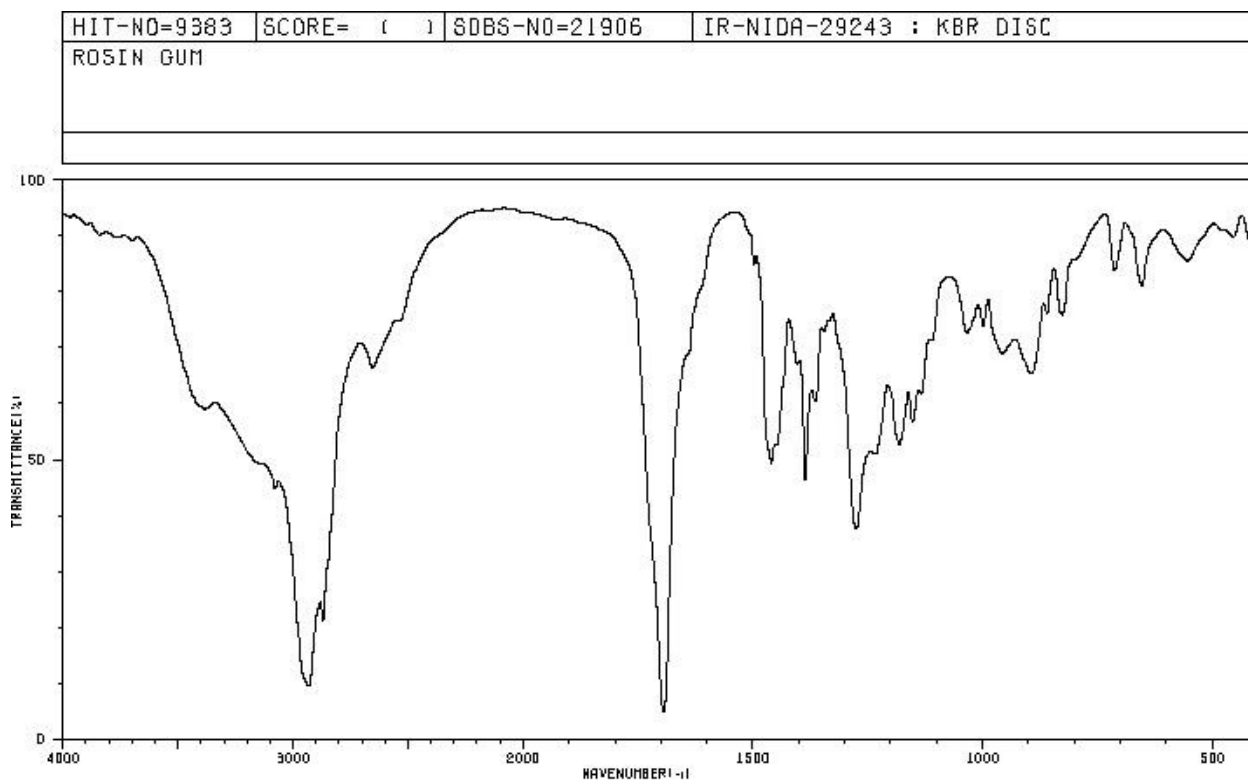

68

|      |    |      |    |      |    |     |    |
|------|----|------|----|------|----|-----|----|
| 3362 | 57 | 1498 | 81 | 1189 | 52 | 893 | 62 |
| 3078 | 43 | 1460 | 47 | 1182 | 50 | 860 | 72 |
| 2950 | 10 | 1449 | 50 | 1153 | 55 | 828 | 72 |
| 2933 | 9  | 1386 | 44 | 1033 | 70 | 713 | 81 |
| 2869 | 20 | 1372 | 60 | 998  | 70 | 653 | 79 |
| 2853 | 84 | 1354 | 58 | 956  | 86 | 554 | 81 |
| 1694 | 4  | 1276 | 36 | 901  | 64 | 466 | 86 |

|  |
|--|
|  |
|--|

69

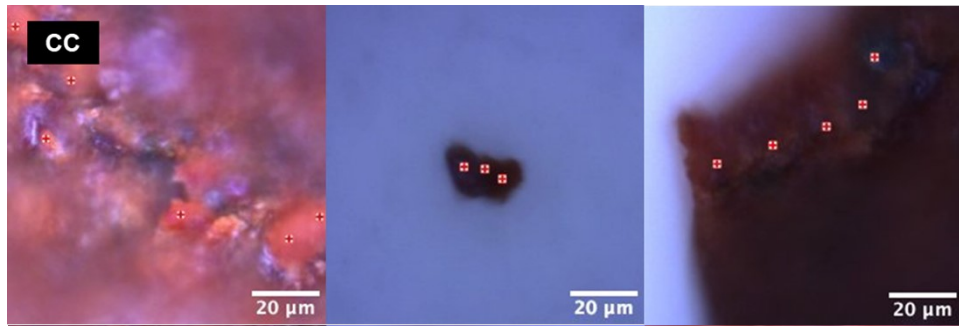

70

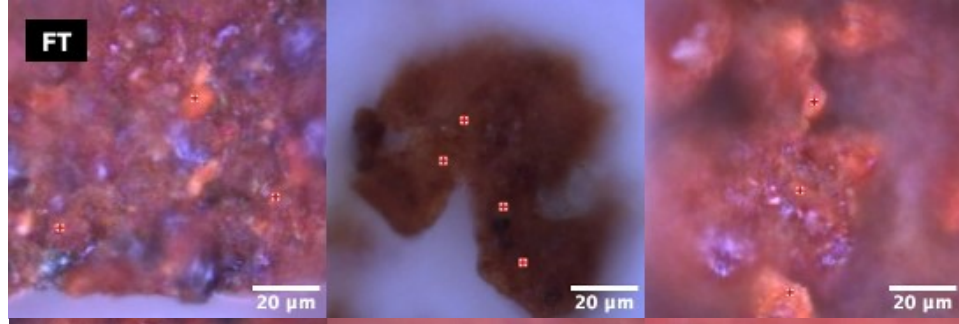

71

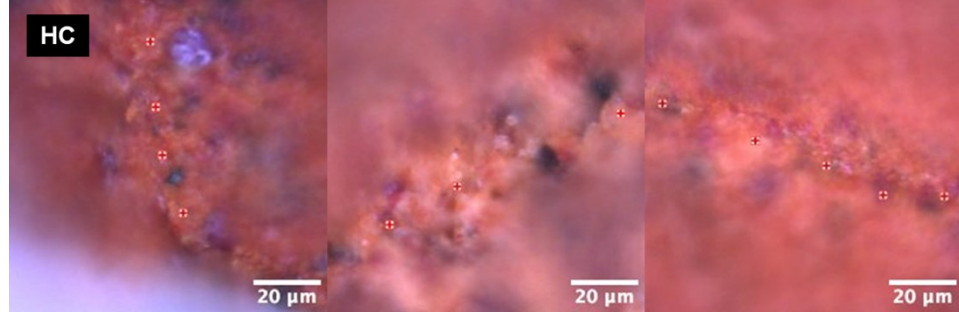

72

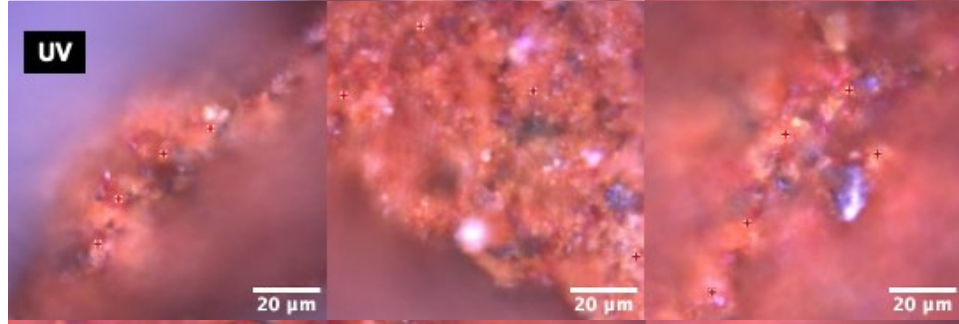

73

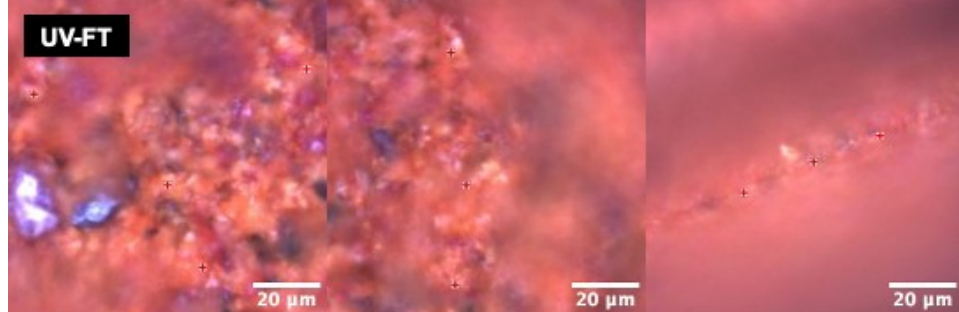

74 **Figure S3.** Representative images of antifouling paint microplastics of controls (CC and HC) and  
75 weathering treatments (UV, FT, and UV-FT) imaged on the filter, from which the O-PTIR spectra  
76 were acquired. Each row corresponds to one weathering condition, and the three columns show

77 replicate particles selected for that condition to demonstrate within-treatment variability. Red  
78 markers indicate where OPTIR spectra were acquired and depict the morphology and visual  
79 appearance of the analyzed paint fragments for the specific condition.

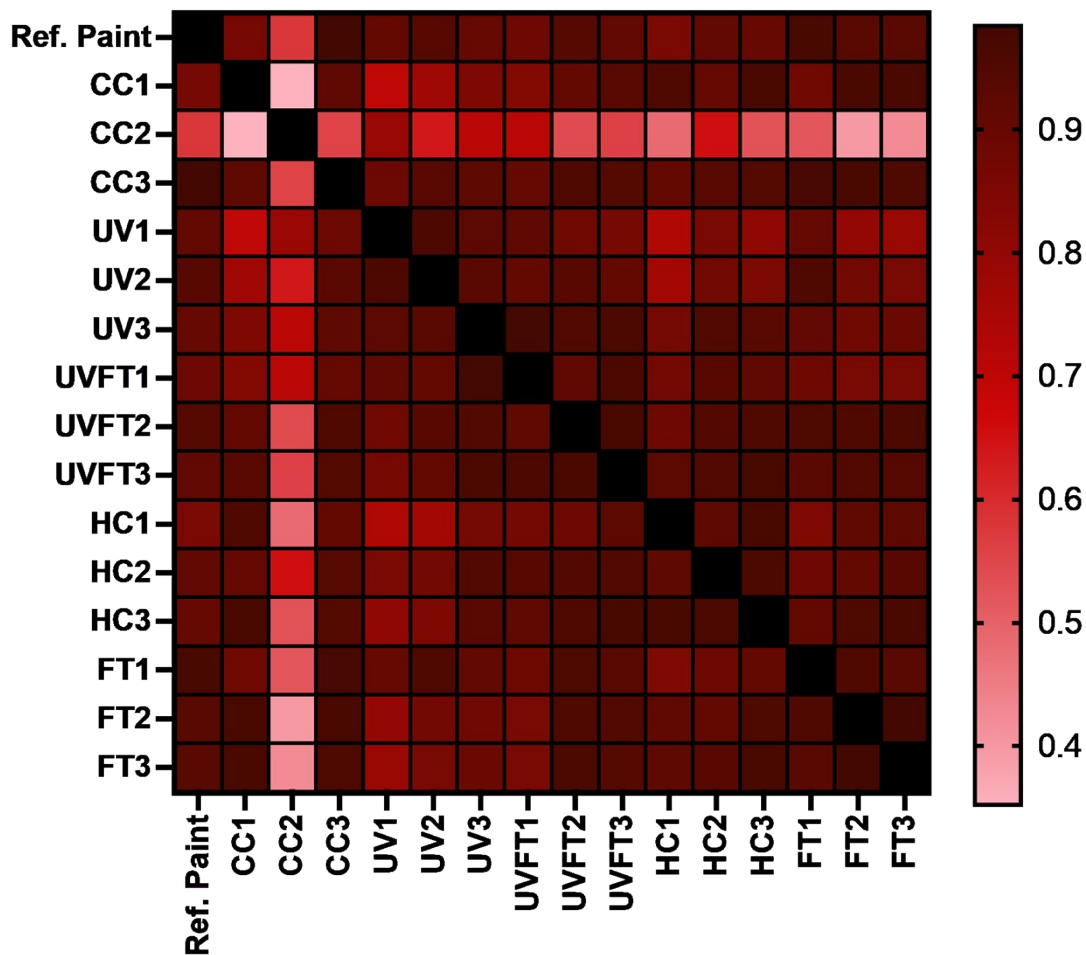

81  
 82  
 83  
 84  
 85  
 86  
 87  
 88  
 89

**Figure S4.** A heatmap of Pearson correlation coefficients comparing weathered antifouling paint microplastics from treatments and reference antifouling paint (denoted as Ref. Paint). Nine spectra were averaged for each comparison. Treatments are denoted as CC = cold control, HC = heat control, UV = UV irradiation, FT = freeze-thaw, and UV-FT = UV and FT combination. Each replicate is denoted after the treatment name (e.g., CC1, CC2, and CC3). Black squares indicate that the correlation is equal to 1.

90 **Text S2.** CC had the lowest calculated coefficient yet experienced the least weathering exposure.  
91 Replicate 2 from the CC (CC2) had the lowest Pearson correlation coefficient (Figure S3). The  
92 particles used to acquire spectra in this sample were quite small (<50  $\mu\text{m}$ ) and interference from  
93 the filter may have added noise to the spectra. Also, insufficient material from the paint  
94 microplastics may have affected the signal intensity. Overall, comparing all the weathered paint  
95 microplastics to each other revealed high correlation coefficients. This confirms that the spectra,  
96 even among weathered paint microplastics, were very similar, with no substantial changes in the  
97 organic components of paint.

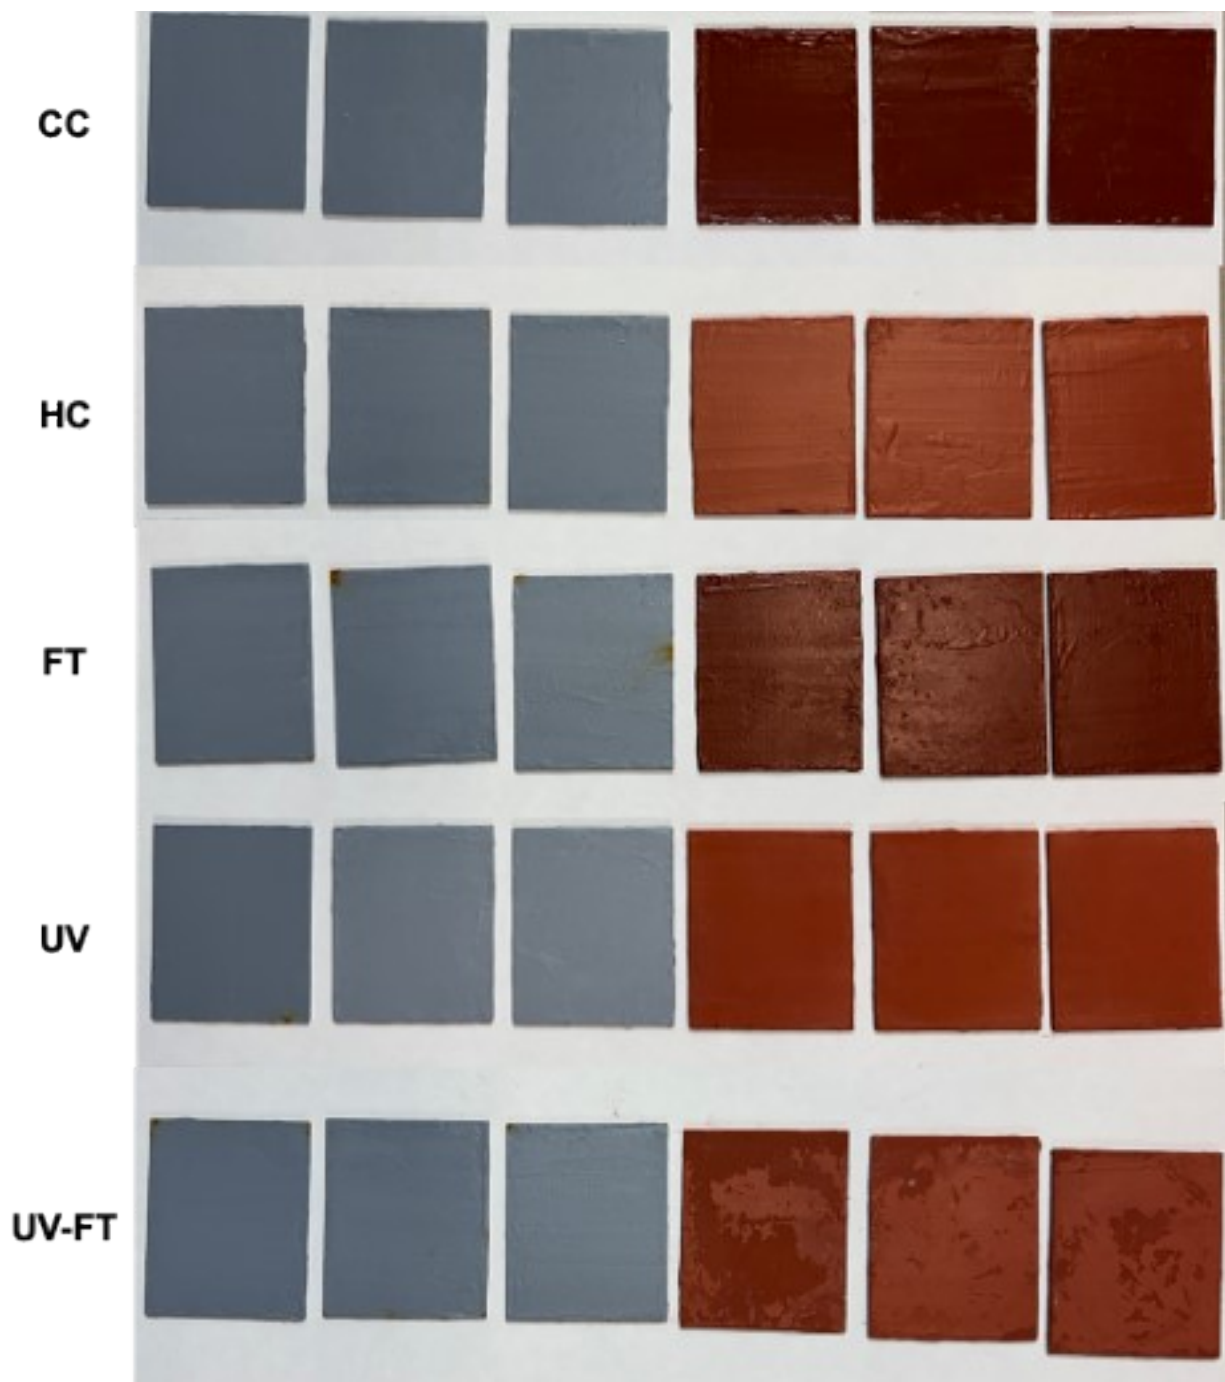

98  
99

100 **Figure S5.** Representative images of coupons for primer paint (grey coupons) and antifouling paint  
 101 (red coupons) after a six-week exposure to the different weathering treatments or controls.  
 102 Treatments or controls are denoted as CC = cold control, HC = heat control, UV = UV irradiation,  
 103 FT = freeze-thaw, and UV-FT = UV and FT combination.

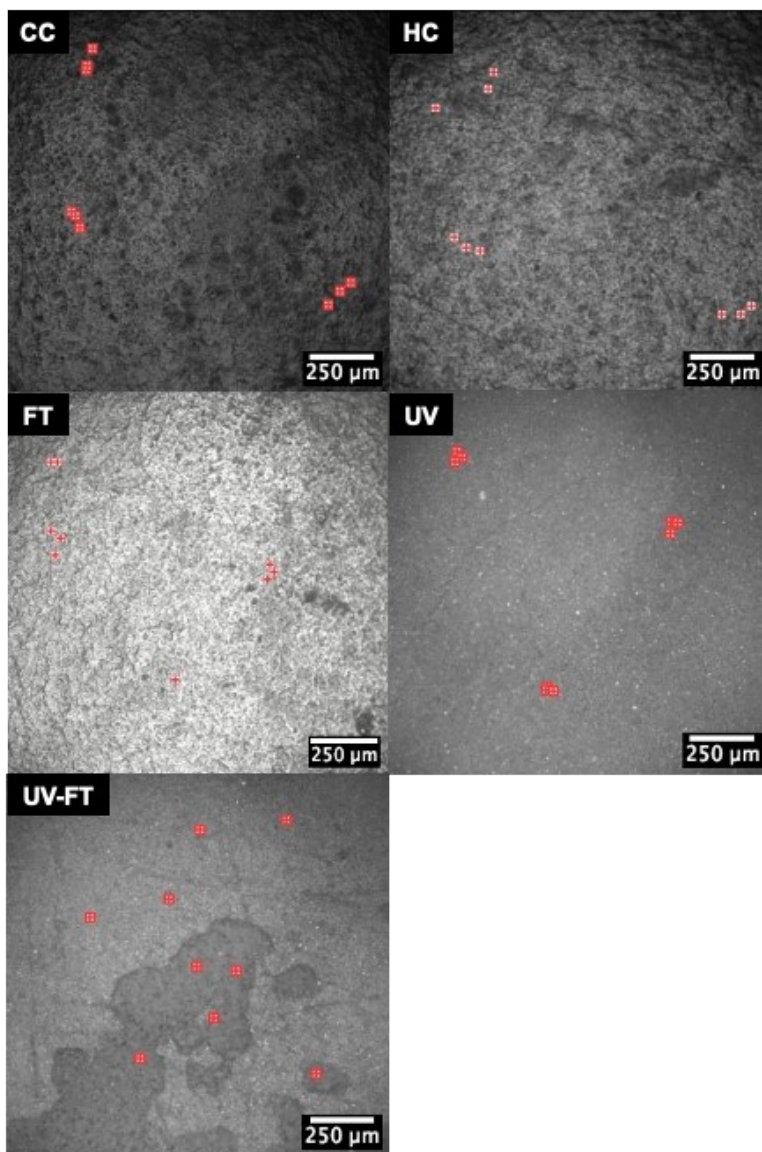

104  
105

106 **Figure S6.** Representative images of coupons taken with the O-PTIR for antifouling paint after a  
107 six-week exposure to the different weathering treatment or controls. Treatments or controls are  
108 denoted as CC = cold control, HC = heat control, UV = UV irradiation, FT = freeze-thaw, and  
109 UV-FT = UV and FT combination. Red markers show spots where a spectrum was acquired.

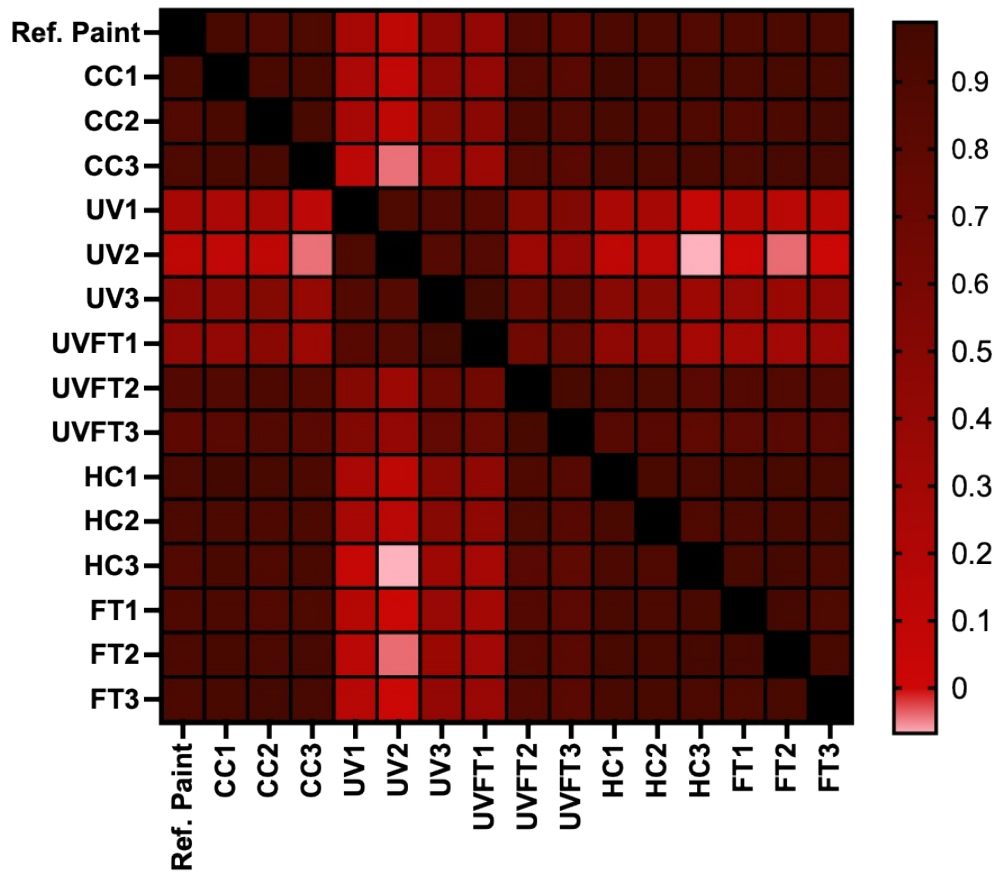

110  
111

112 **Figure S7.** A heatmap of Pearson correlation coefficients comparing exposed antifouling paint  
113 coupons and reference antifouling paint (denoted as Ref. Paint). The average of nine spectra were  
114 used for each comparison. Treatments or controls are denoted as CC = cold control, HC = heat  
115 control, UV = UV irradiation, FT = freeze-thaw, and UV-FT = UV and FT combination. Each  
116 replicate is denoted after the treatment or control name. Black squares indicate the correlation is  
117 equal to 1.

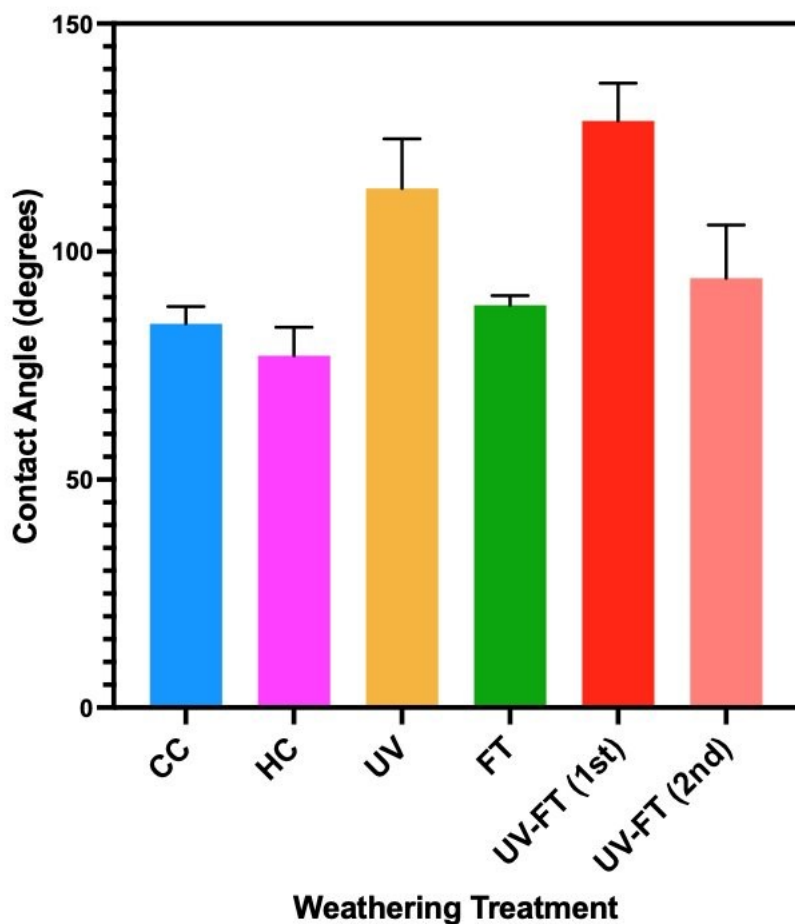

118

119 **Figure S8.** Contact angles (degrees) for water droplets on exposed antifouling paint coupons.  
 120 Treatments or controls are denoted as CC = cold control, HC = heat control, UV = UV irradiation,  
 121 FT = freeze-thaw, and UV-FT = UV and FT combination. The paint layer at which the contact  
 122 angle for UV-FT was measured is indicated in parentheses. Error bars indicate standard deviation.

123

124

125

126

127 **Table S3.** Results of Mann-Whitney U-test comparing the water contact angles of the exposed  
 128 antifouling paint coupons. Asterisks define significance, where: ns = nonsignificant, \* = p < 0.05  
 129 significant, \*\* = p < 0.01 highly significant, and \*\*\* = p < 0.001 very highly significant.

| Weathering treatment/control  | Cold Control (CC) | Heat Control (HC) | Freeze-Thaw (FT) | UV | UV-FT (1 <sup>st</sup> layer) | UV-FT (2 <sup>nd</sup> layer) |
|-------------------------------|-------------------|-------------------|------------------|----|-------------------------------|-------------------------------|
| Cold Control (CC)             |                   | *                 | ns               | ** | **                            | ns                            |
| Heat Control (HC)             | *                 |                   | *                | ** | **                            | *                             |
| Freeze-Thaw (FT)              | ns                | *                 |                  | ** | **                            | ns                            |
| UV                            | **                | **                | **               |    | ns                            | *                             |
| UV-FT (1 <sup>st</sup> layer) | **                | **                | **               | ns |                               | **                            |
| UV-FT (2 <sup>nd</sup> layer) | ns                | *                 | ns               | *  | **                            |                               |

130

131

132

133 **Table S4.** Average Pearson correlation coefficient (n = 9) of weathered antifouling paint  
134 microplastics compared to weathered antifouling paint coupons.

| <b>Weathering<br/>treatment/control</b> | <i>CC coupon</i> | <i>UV coupon</i> | <i>UV-FT coupon</i> | <i>HC coupon</i> | <i>FT coupon</i> |
|-----------------------------------------|------------------|------------------|---------------------|------------------|------------------|
| <i>CC paint microplastics</i>           | <b>0.67</b>      | 0.35             | 0.62                | 0.69             | 0.69             |
| <i>UV paint microplastics</i>           | 0.82             | <b>0.43</b>      | 0.74                | 0.81             | 0.80             |
| <i>UV-FT paint microplastics</i>        | 0.82             | 0.35             | <b>0.72</b>         | 0.84             | 0.84             |
| <i>HC paint microplastics</i>           | 0.73             | 0.31             | 0.65                | <b>0.79</b>      | 0.80             |
| <i>FT paint microplastics</i>           | 0.83             | 0.13             | 0.59                | 0.85             | <b>0.87</b>      |

135

136

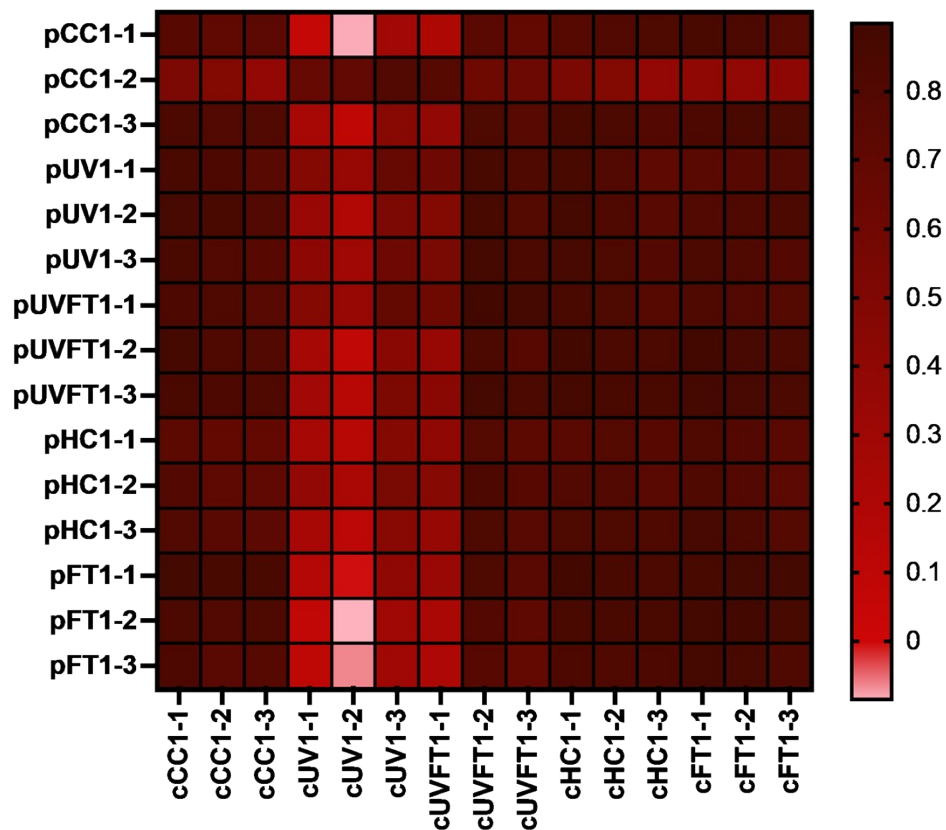

137  
 138  
 139  
 140  
 141  
 142  
 143  
 144  
 145

**Figure S9.** A heatmap of Pearson correlation coefficients comparing weathered antifouling paint microplastics and exposed antifouling paint coupons. The average of nine spectra were used for each comparison. Each comparison is denoted as either p = paint microplastics and c = coupon. Treatments or controls are denoted as CC = cold control, HC = heat control, UV = UV irradiation, FT = freeze-thaw, and UV-FT = UV and FT combination. Each replicate is denoted after the treatment or control name.

146 **Table S5.** Descriptive statistics of particle sizes and particle counts of microscopic images from  
 147 weathered antifouling paint treatments and controls, analyzed using ImageJ. All values were blank  
 148 subtracted.

| <b>Weathering treatment/control</b> | <b>Average median size (mm ± SD)</b> | <b>Average mean size (mm ± SD)</b> | <b>Average minimum size (mm ± SD)</b> | <b>Average maximum size (mm ± SD)</b> | <b>Average particle count (particles/mL ± SD)</b> |
|-------------------------------------|--------------------------------------|------------------------------------|---------------------------------------|---------------------------------------|---------------------------------------------------|
| Cold Control (CC)                   | 0.03 ± 0.01                          | 0.04 ± 0.007                       | 0.007 ± 0.0002                        | 0.7 ± 0.5                             | 2 ± 3                                             |
| Hot Control (HC)                    | 0.02 ± 0.00                          | 0.04 ± 0.02                        | 0.007 ± 0.0002                        | 1.1 ± 0.7                             | 6 ± 6                                             |
| Freeze-Thaw (FT)                    | 0.03 ± 0.01                          | 0.07 ± 0.02                        | 0.006 ± 1E-18                         | 3.3 ± 1.0                             | 67 ± 30                                           |
| UV                                  | 0.02 ± 0.00                          | 0.03 ± 0.004                       | 0.006 ± 0.0006                        | 1.0 ± 0.3                             | 14 ± 10                                           |
| UV-FT*                              | N.D.                                 | N.D.                               | N.D.                                  | N.D.                                  | N.D.                                              |

149 \*Particle counts and size for UV-FT are not defined (N.D.) as the filter was saturated with particles.  
 150

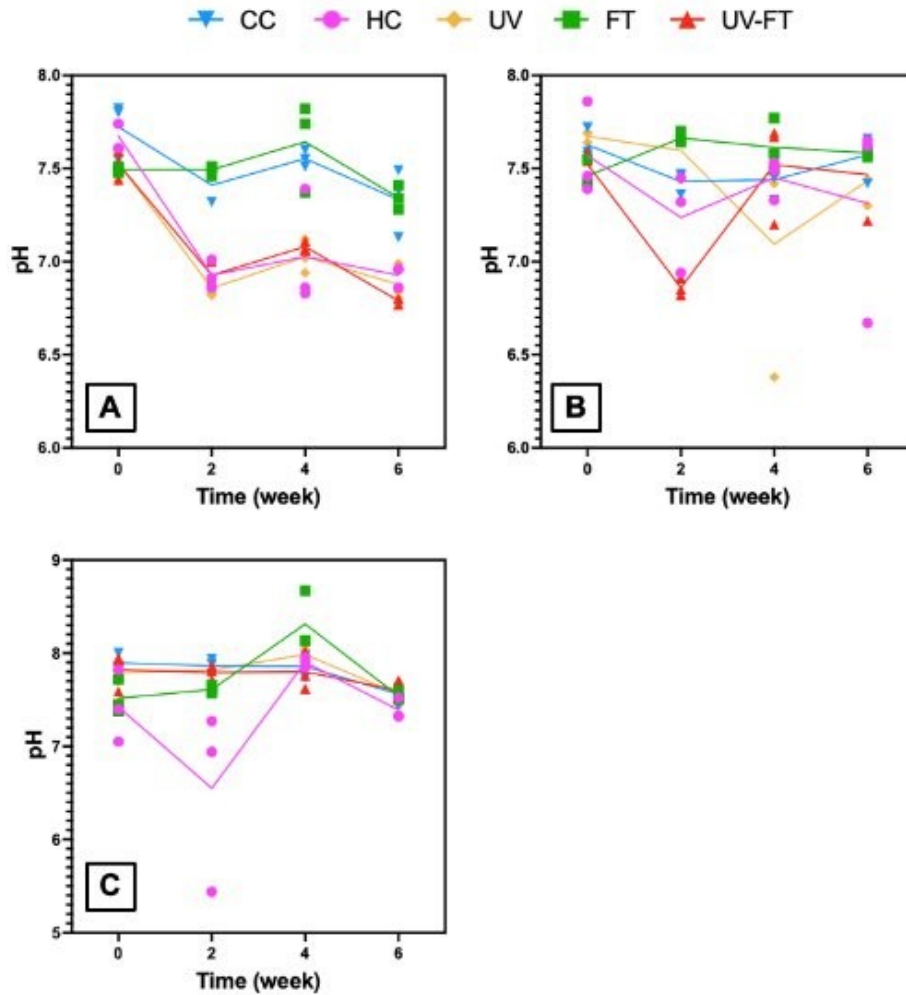

151  
 152 **Figure S10.** pH measurements for (A) antifouling paint, (B) primer paint and (C) procedural  
 153 blanks exposed to the appropriate weathering treatment or control. The connected lines at each  
 154 timepoint represent the median. Each replicate measurement is shown for every timepoint (n = 3).  
 155  
 156

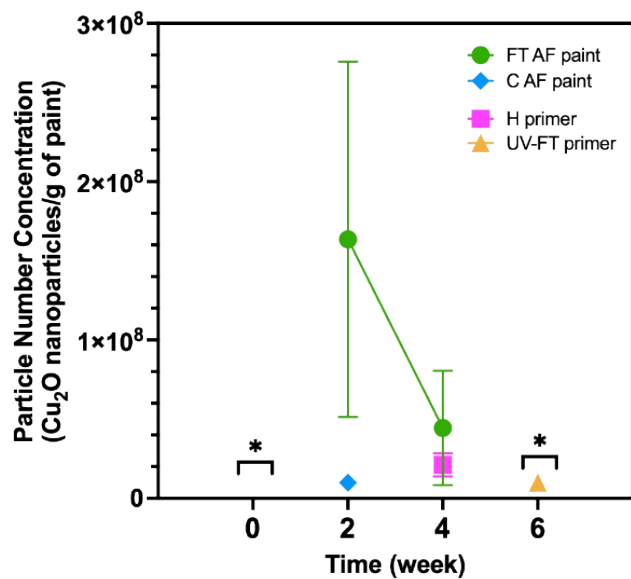

157

158 **Figure S11.** Average number concentrations of Cu<sub>2</sub>O nanoparticles per gram of dry paint (number  
 159 of nanoparticles/g of dry paint). Concentrations are shown for antifouling paints exposed to FT  
 160 and CC treatments, and primer exposed to UV-FT and HC treatments as a function of time. Error  
 161 bars denote standard deviation of triplicate measurements (n = 3). Asterisks denote time points  
 162 that were statistically insignificant (i.e., <200 particle events).

163

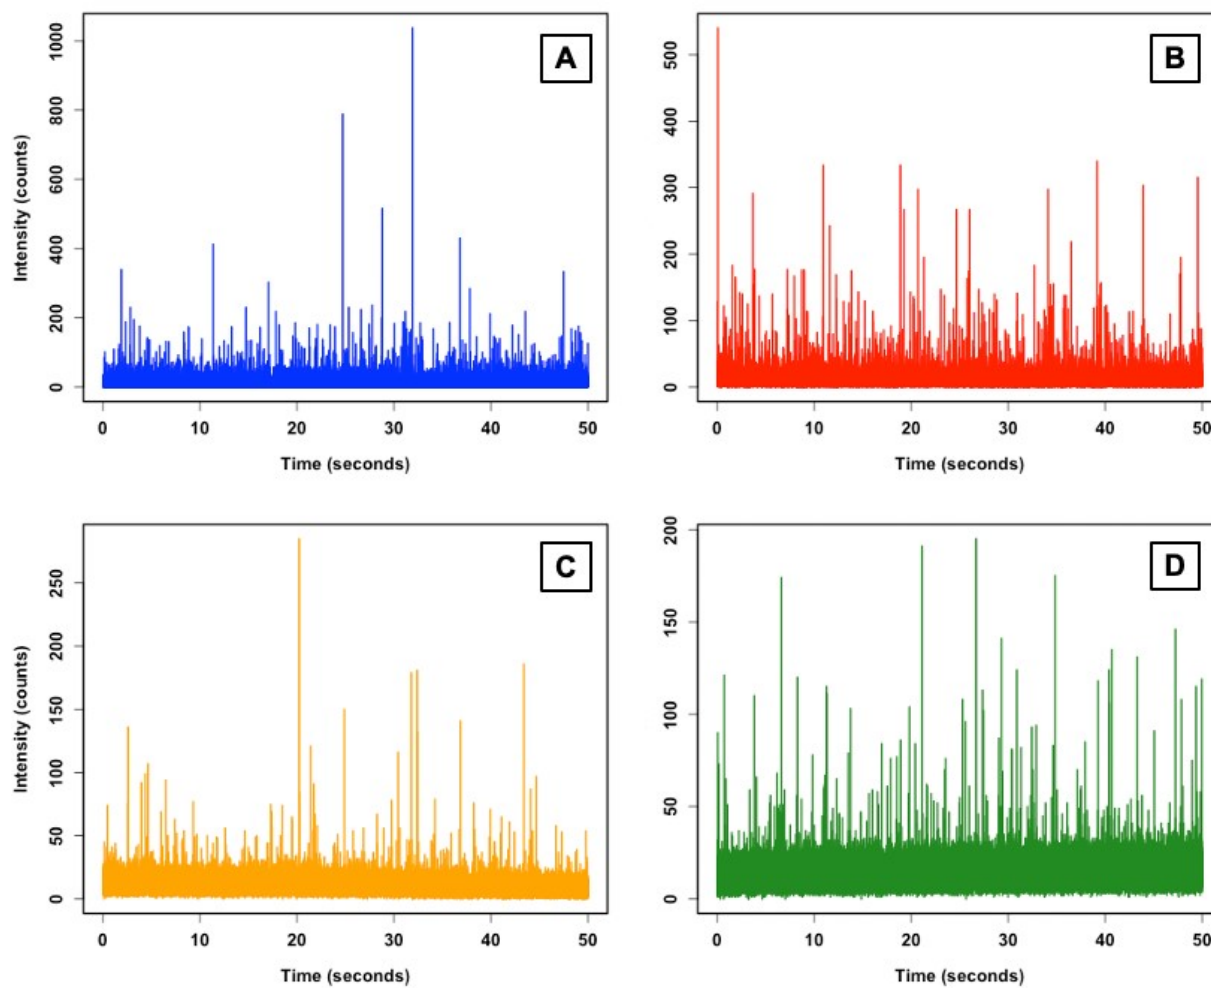

164  
 165 **Figure S12.** Representative examples of raw SP-ICP-MS data for  $\text{Cu}_2\text{O}$  released from antifouling  
 166 paints exposed to (A) FT treatment at 2 weeks, (B) FT treatment at 4 weeks, (C) FT treatment at 6  
 167 weeks, and (D) CC control at 2 weeks.  
 168

169 **Table S6.** Average mass concentration ( $\mu\text{g/L} \pm \text{SD}$ ), average dissolved (ionic) background ( $\mu\text{g/L}$   
 170  $\pm \text{SD}$ ), and fraction of average mass concentration of  $\text{Cu}_2\text{O}$  divided by the average dissolved  
 171 background ( $\% \pm \text{SD}$ ) obtained from untreated SP-ICP-MS data. Individual triplicates are shown  
 172 for controls and weathering treatments.

| <b>Weathering treatment/control</b> | <b>Week</b> | <b>Average mass concentration (<math>\mu\text{g/L} \pm \text{SD}</math>)</b> | <b>Average dissolved background (<math>\mu\text{g/L} \pm \text{SD}</math>)</b> | <b>Average mass concentration divided by average dissolved background (<math>\% \pm \text{SD}</math>)</b> |
|-------------------------------------|-------------|------------------------------------------------------------------------------|--------------------------------------------------------------------------------|-----------------------------------------------------------------------------------------------------------|
| Cold Control (CC)                   | 2           | $0.75 \pm 0.2$                                                               | $17 \pm 10$                                                                    | $4.3 \pm 6$                                                                                               |
|                                     |             | $1.0 \pm 1$                                                                  | $11 \pm 7$                                                                     | $18 \pm 27$                                                                                               |
|                                     |             | $1.2 \pm 0.7$                                                                | $19 \pm 11$                                                                    | $6.4 \pm 3$                                                                                               |
| Freeze-Thaw (FT)                    | 2           | $0.55 \pm 0.06$                                                              | $3.6 \pm 0.8$                                                                  | $15 \pm 1$                                                                                                |
|                                     |             | $0.14 \pm 0.01$                                                              | $2.0 \pm 0.5$                                                                  | $6.8 \pm 1$                                                                                               |
|                                     |             | $0.33 \pm 0.05$                                                              | $3.2 \pm 0.7$                                                                  | $10 \pm 1$                                                                                                |
|                                     | 4           | $0.21 \pm 0.06$                                                              | $4.1 \pm 1$                                                                    | $5.3 \pm 2$                                                                                               |
|                                     |             | $0.055 \pm 0.004$                                                            | $2.4 \pm 0.6$                                                                  | $2.3 \pm 0.4$                                                                                             |
|                                     |             | $0.044 \pm 0.004$                                                            | $3.2 \pm 0.7$                                                                  | $1.4 \pm 0.36$                                                                                            |
|                                     | 6           | $0.029 \pm 0.004$                                                            | $3.8 \pm 0.6$                                                                  | $0.78 \pm 0.09$                                                                                           |
|                                     |             | $0.033 \pm 0.008$                                                            | $6.2 \pm 0.9$                                                                  | $0.54 \pm 0.07$                                                                                           |
|                                     |             | $0.027 \pm 0.003$                                                            | $7.7 \pm 1$                                                                    | $0.36 \pm 0.09$                                                                                           |

173

174

## 175 References

- 176 1 A.-K. Müller, J. Brehm, M. Völkl, V. Jérôme, C. Laforsch, R. Freitag and A. Greiner,  
177 Disentangling biological effects of primary nanoplastics from dispersion paints' additional  
178 compounds, *Ecotoxicol. Environ. Saf.*, 2022, **242**, 113877.
- 179 2 C. Fang, W. Zhou, J. Hu, C. Wu, J. Niu and R. Naidu, Paint has the potential to release  
180 microplastics, nanoplastics, inorganic nanoparticles, and hybrid materials, *Environ. Sci.*  
181 *Eur.*, 2024, **36**, 17.
- 182 3 A. A. Horton, C. Svendsen, R. J. Williams, D. J. Spurgeon and E. Lahive, Large  
183 microplastic particles in sediments of tributaries of the River Thames, UK – Abundance,  
184 sources and methods for effective quantification, *Mar. Pollut. Bull.*, 2017, **114**, 218–226.
- 185 4 Y. K. Song, S. H. Hong, M. Jang, J.-H. Kang, O. Y. Kwon, G. M. Han and W. J. Shim,  
186 Large Accumulation of Micro-sized Synthetic Polymer Particles in the Sea Surface  
187 Microlayer, *Environ. Sci. Technol.*, 2014, **48**, 9014–9021.
- 188 5 A. L. d. F. Lacerda, L. dos S. Rodrigues, E. van Seville, F. L. Rodrigues, L. Ribeiro, E. R.  
189 Secchi, F. Kessler and M. C. Proietti, Plastics in sea surface waters around the Antarctic  
190 Peninsula, *Sci. Rep.*, 2019, **9**, 3977.
- 191 6 M. M. Borges Ramirez, R. Dzul Caamal and J. Rendón von Osten, Occurrence and  
192 seasonal distribution of microplastics and phthalates in sediments from the urban channel  
193 of the Ria and coast of Campeche, Mexico, *Science of The Total Environment*, 2019, **672**,  
194 97–105.
- 195 7 A. Turner, C. Ostle and M. Wootton, Occurrence and chemical characteristics of  
196 microplastic paint flakes in the North Atlantic Ocean, *Science of the Total Environment*,  
197 2022, **806**, 150375.
- 198 8 M. F. Mengatto and R. H. Nagai, A first assessment of microplastic abundance in sandy  
199 beach sediments of the Paranaguá Estuarine Complex, South Brazil (RAMSAR site), *Mar.*  
200 *Pollut. Bull.*, 2022, **177**, 113530.
- 201 9 T. Mani, S. Primpke, C. Lorenz, G. Gerdts and P. Burkhardt-Holm, Microplastic Pollution  
202 in Benthic Midstream Sediments of the Rhine River, *Environ. Sci. Technol.*, 2019, **53**,  
203 6053–6062.
- 204 10 C. Higgins and A. Turner, Microplastics in surface coastal waters around Plymouth, UK,  
205 and the contribution of boating and shipping activities, *Science of The Total Environment*,  
206 2023, **893**, 164695.
- 207 11 D.-H. Chae, I.-S. Kim, S.-K. Kim, Y. K. Song and W. J. Shim, Abundance and  
208 Distribution Characteristics of Microplastics in Surface Seawaters of the  
209 Incheon/Kyeonggi Coastal Region, *Arch. Environ. Contam. Toxicol.*, 2015, **69**, 269–278.
- 210 12 O. Y. Kwon, J.-H. Kang, S. H. Hong and W. J. Shim, Spatial distribution of microplastic  
211 in the surface waters along the coast of Korea, *Mar. Pollut. Bull.*, 2020, **155**, 110729.
- 212 13 R. Jaouani, C. Mouneyrac, A. Châtel, F. Amiard, M. Dellali, H. Beyrem, A. Michelet and  
213 F. Lagarde, Seasonal and spatial distribution of microplastics in sediments by FTIR  
214 imaging throughout a continuum lake - lagoon- beach from the Tunisian coast, *Science of*  
215 *The Total Environment*, 2022, **838**, 156519.
- 216 14 J. A. Ivar do Sul, M. F. Costa and G. Fillmann, Microplastics in the pelagic environment  
217 around oceanic islands of the Western Tropical Atlantic Ocean, *Water Air Soil Pollut.*,  
218 2014, **225**, 2004.

- 219 15 J.-H. Kang, O. Y. Kwon, K.-W. Lee, Y. K. Song and W. J. Shim, Marine neustonic  
220 microplastics around the southeastern coast of Korea, *Mar. Pollut. Bull.*, 2015, **96**, 304–  
221 312.
- 222 16 A. R. A. Lima, M. F. Costa and M. Barletta, Distribution patterns of microplastics within  
223 the plankton of a tropical estuary, *Environ. Res.*, 2014, **132**, 146–155.
- 224 17 H. K. Imhof, C. Laforsch, A. C. Wiesheu, J. Schmid, P. M. Anger, R. Niessner and N. P.  
225 Ivleva, Pigments and plastic in limnetic ecosystems: A qualitative and quantitative study  
226 on microparticles of different size classes, *Water Res.*, 2016, **98**, 64–74.
- 227 18 C. Leistenschneider, P. Burkhardt-Holm, T. Mani, S. Primpke, H. Taubner and G. Gerdts,  
228 Microplastics in the Weddell Sea (Antarctica): A Forensic Approach for Discrimination  
229 between Environmental and Vessel-Induced Microplastics, *Environ. Sci. Technol.*, 2021,  
230 **55**, 15900–15911.
- 231 19 C. Dibke, M. Fischer and B. M. Scholz-Böttcher, Microplastic Mass Concentrations and  
232 Distribution in German Bight Waters by Pyrolysis–Gas Chromatography–Mass  
233 Spectrometry/Thermochemolysis Reveal Potential Impact of Marine Coatings: Do Ships  
234 Leave Skid Marks?, *Environ. Sci. Technol.*, 2021, **55**, 2285–2295.
- 235 20 A. Gondikas, K. Mattsson and M. Hassellöv, Methods for the detection and  
236 characterization of boat paint microplastics in the marine environment, *Frontiers in*  
237 *Environmental Chemistry*, DOI:10.3389/fenvc.2023.1090704.
- 238 21 S. Zuin, M. Gaiani, A. Ferrari and L. Golanski, Leaching of nanoparticles from  
239 experimental water-borne paints under laboratory test conditions, *Journal of Nanoparticle*  
240 *Research*, 2014, **16**, 2185.
- 241 22 A. Al-Kattan, A. Wichser, R. Vonbank, S. Brunner, A. Ulrich, S. Zuin, Y. Arroyo, L.  
242 Golanski and B. Nowack, Characterization of materials released into water from paint  
243 containing nano-SiO<sub>2</sub>, *Chemosphere*, 2015, **119**, 1314–1321.
- 244 23 X. Zhang, M. Wang, S. Guo, Z. Zhang and H. Li, Effects of weathering and rainfall  
245 conditions on the release of SiO<sub>2</sub>, Ag, and TiO<sub>2</sub> engineered nanoparticles from paints,  
246 *Journal of Nanoparticle Research*, 2017, **19**, 338.
- 247 24 A. Azimzada, J. M. Farner, M. Hadioui, C. Liu-Kang, I. Jreije, N. Tufenkji and K. J.  
248 Wilkinson, Release of TiO<sub>2</sub> nanoparticles from painted surfaces in cold climates:  
249 characterization using a high sensitivity single-particle ICP-MS, *Environ. Sci. Nano*, 2020,  
250 **7**, 139–148.
- 251 25 R. Kaegi, A. Ulrich, B. Sinnet, R. Vonbank, A. Wichser, S. Zuleeg, H. Simmler, S.  
252 Brunner, H. Vonmont, M. Burkhardt and M. Boller, Synthetic TiO<sub>2</sub> nanoparticle emission  
253 from exterior facades into the aquatic environment, *Environmental Pollution*, 2008, **156**,  
254 233–239.
- 255 26 I. Jreije, A. Azimzada, M. Hadioui and K. J. Wilkinson, Stability of CeO<sub>2</sub> nanoparticles  
256 from paints and stains: insights under controlled and environmental scenarios, *Environ.*  
257 *Sci. Nano*, 2022, **9**, 3361–3371.
- 258 27 R. Kaegi, B. Sinnet, S. Zuleeg, H. Hagendorfer, E. Mueller, R. Vonbank, M. Boller and  
259 M. Burkhardt, Release of silver nanoparticles from outdoor facades, *Environmental*  
260 *Pollution*, 2010, **158**, 2900–2905.
- 261 28 A. S. Adeleye, E. A. Oranu, M. Tao and A. A. Keller, Release and detection of nanosized  
262 copper from a commercial antifouling paint, *Water Res.*, 2016, **102**, 374–382.
- 263 29 A. Azimzada, J. M. Farner, I. Jreije, M. Hadioui, C. Liu-Kang, N. Tufenkji, P. Shaw and  
264 K. J. Wilkinson, Single- and Multi-Element Quantification and Characterization of TiO<sub>2</sub>

265 Nanoparticles Released From Outdoor Stains and Paints, *Front. Environ. Sci.*,  
266 DOI:10.3389/fenvs.2020.00091.  
267 30 A. Al-Kattan, A. Wichser, R. Vonbank, S. Brunner, A. Ulrich, S. Zuin and B. Nowack,  
268 Release of TiO<sub>2</sub> from paints containing pigment-TiO<sub>2</sub> or nano-TiO<sub>2</sub> by weathering,  
269 *Environ. Sci. Process. Impacts*, 2013, **15**, 2186.  
270 31 N. Singh and A. Turner, Trace metals in antifouling paint particles and their  
271 heterogeneous contamination of coastal sediments, *Mar. Pollut. Bull.*, 2009, **58**, 559–564.  
272 32 A. Jalaie, A. Afshaar, S. B. Mousavi and M. Heidari, Investigation of the Release Rate of  
273 Biocide and Corrosion Resistance of Vinyl-, Acrylic-, and Epoxy-Based Antifouling  
274 Paints on Steel in Marine Infrastructures, *Polymers (Basel)*, 2023, **15**, 3948.  
275 33 M. Simon, A. Vianello, Y. Shashoua and J. Vollertsen, Accelerated weathering affects the  
276 chemical and physical properties of marine antifouling paint microplastics and their  
277 identification by ATR-FTIR spectroscopy, *Chemosphere*, 2021, **274**, 129749.  
278 34 L. Holmes and A. Turner, Leaching of hydrophobic Cu and Zn from discarded marine  
279 antifouling paint residues: Evidence for transchelation of metal pyridiones,  
280 *Environmental Pollution*, 2009, **157**, 3440–3444.  
281 35 A. Jessop and A. Turner, Leaching of Cu and Zn from discarded boat paint particles into  
282 tap water and rain water, *Chemosphere*, 2011, **83**, 1575–1580.  
283 36 Interlux, *Micron CSC - CA Red - Safety Datasheet*, 2021.  
284 37 Interlux, *Interprotect Grey Base - Safety Datasheet*, 2014.  
285 38 Chemical Book, Rosin(8050-09-7) IR2,  
286 [https://www.chemicalbook.com/SpectrumEN\\_8050-09-7\\_IR2.htm](https://www.chemicalbook.com/SpectrumEN_8050-09-7_IR2.htm), (accessed 29 January  
287 2026).  
288
